# Supplementary material for: A CSF-cytokine code predicts macrophage response polarity and tumor outcomes
Source: Research Square preprint supplement (doi:10.21203/rs.3.rs-7346391/v1), 2025-08-28
Supplement: Supplementary file 1 [file 4dd7436c2807e60e6a6fa22c.pdf]

## **A CSF-cytokine code predicts macrophage response polarity and tumor outcomes**

Dominik J. Schaer<sup>1</sup>, Nadja Schulthess-Lutz<sup>1</sup>, Matthias J. Peterhans<sup>1</sup>, Livio Baselgia<sup>1</sup>, Melanie Eschment<sup>1</sup>, Rok Humar,<sup>1</sup> Florence Vallelian\*<sup>1</sup>

<sup>1</sup> Department of Internal Medicine, University Hospital and University of Zurich, Zurich, Switzerland

### **Supplementary Figures**

## Supplementary Figure 1

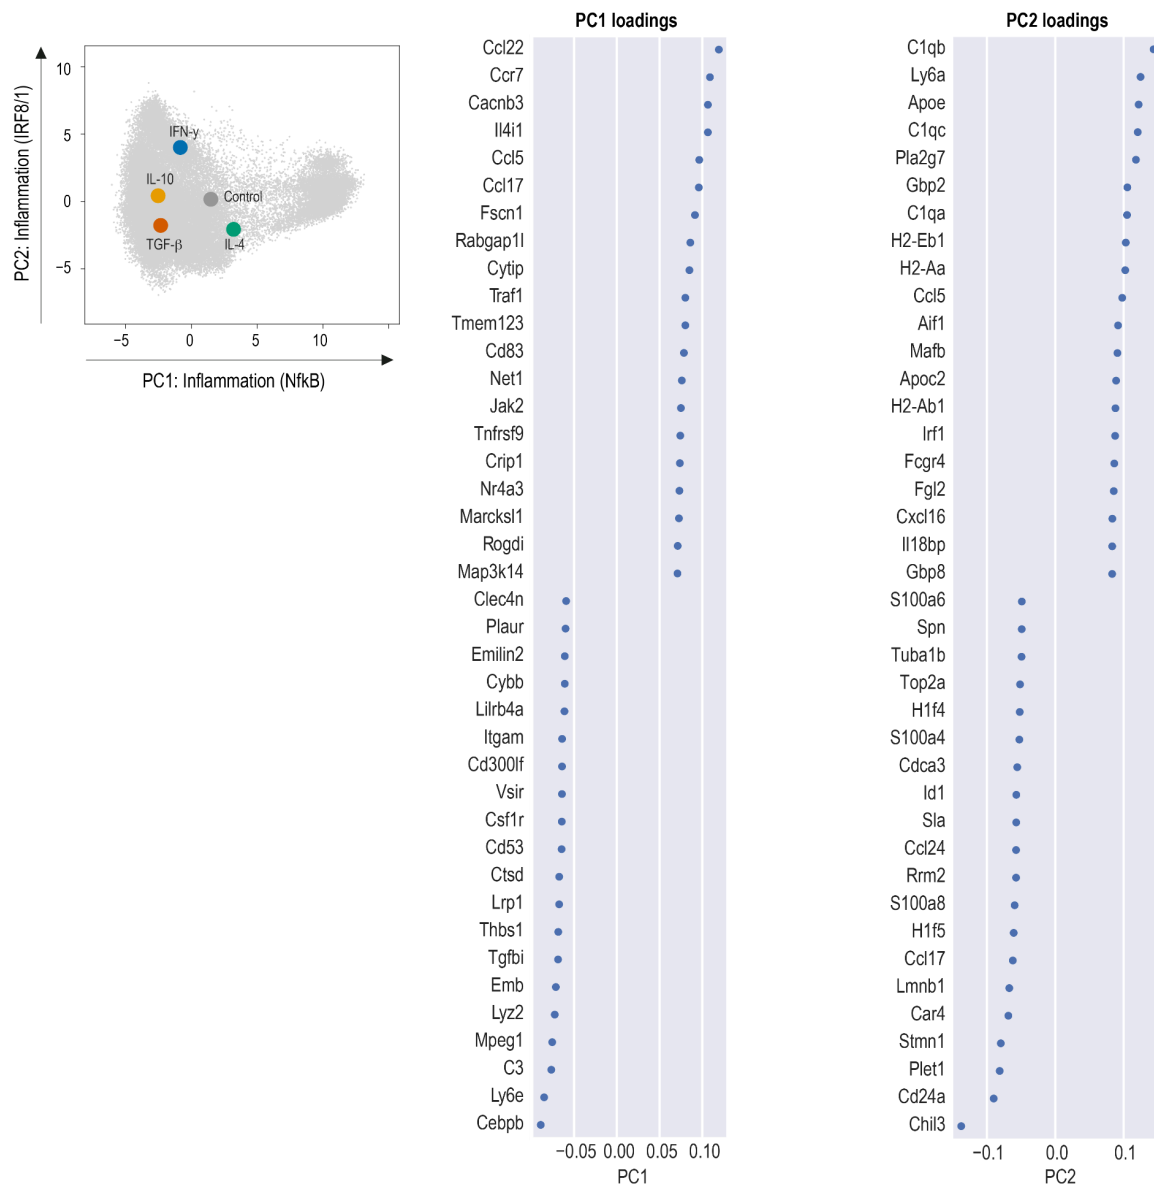

## Supplementary Figure 1

BM precursors were cultured with GM-CSF alone or in combination with IFN- $\gamma$ , IL-4, IL-10, or TGF- $\beta$  and analyzed by multiplexed scRNA-seq (see Fig. 2). Principal-component analysis (PCA) identified two dominant axes of variation. The 20 genes with the highest positive and negative loadings for PC1 and PC2 are listed.

## Supplementary Figure 2

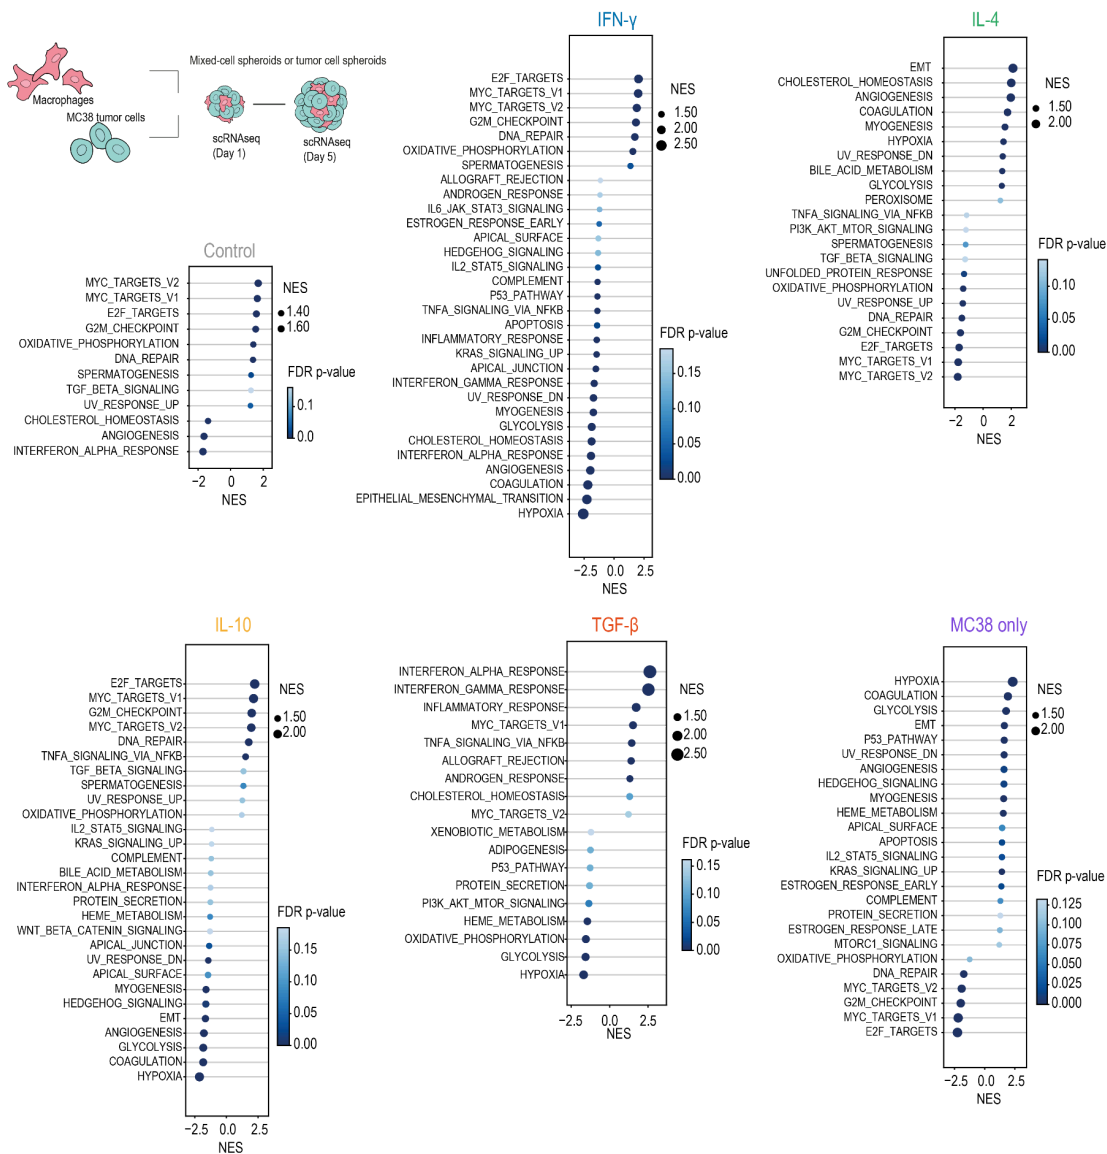

## Supplementary Figure 2

Time-resolved, multiplexed scRNA-seq experiment of mixed cell spheroids composed of M-CSF macrophages and MC38 cancer cells (see Fig. 4). Cells per treatment were functionally annotated according to GSEA (Hallmark gene sets).

## Supplementary Figure 3

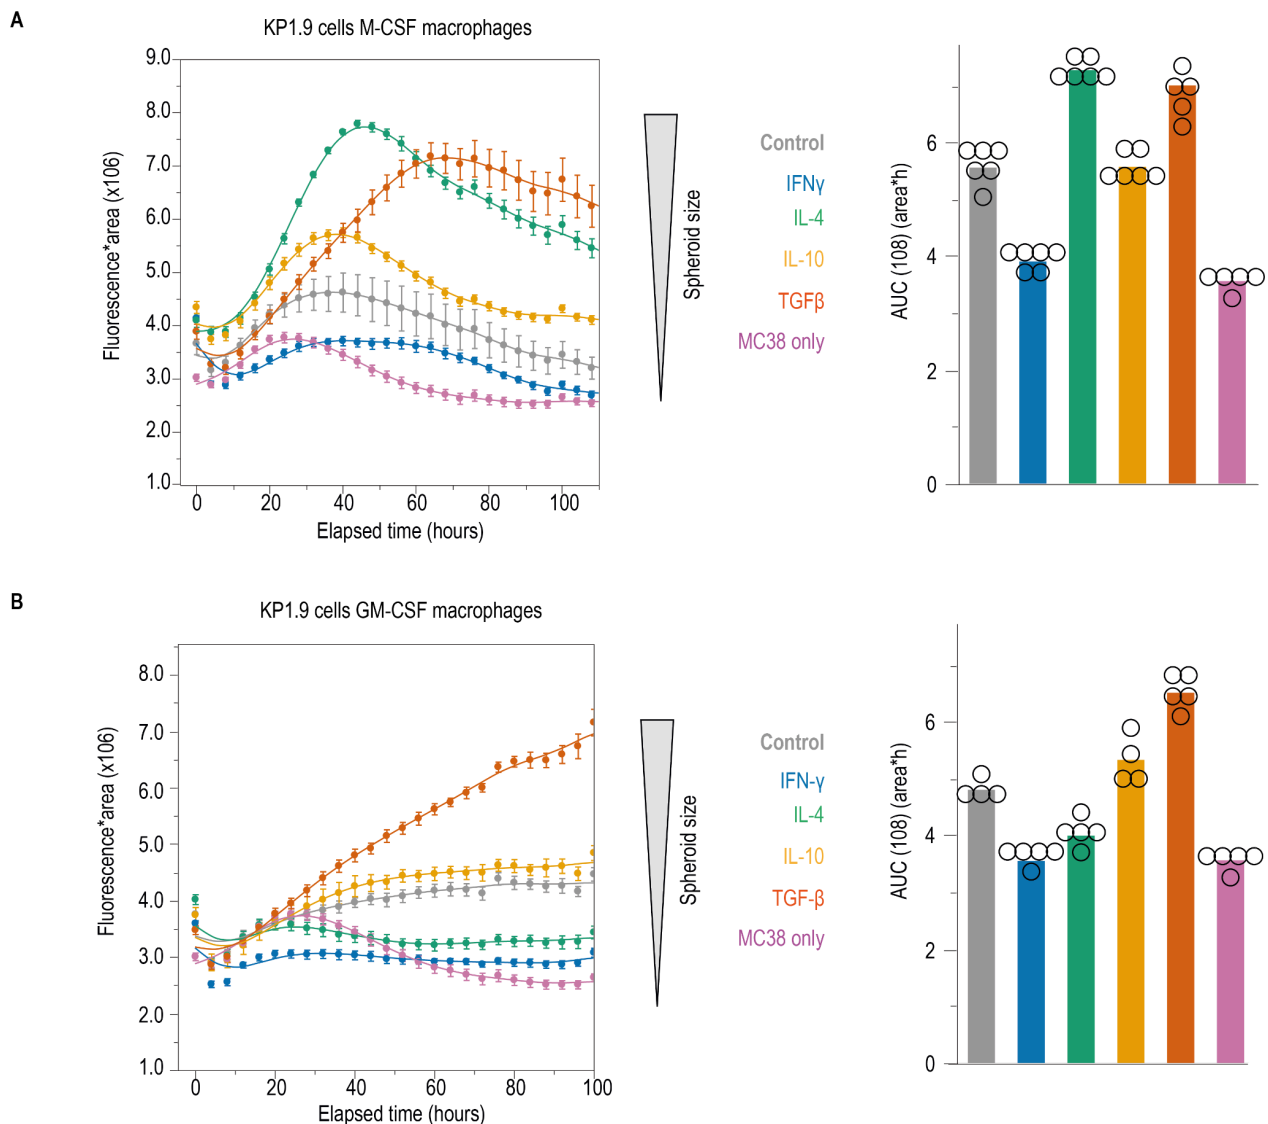

## Supplementary Figure 3

**A.** GFP-KP1.9 cells were cultured alone or mixed 1:2 with cytokine-polarised M-CSF or GM-CSF macrophages in ultra-low-attachment plates and imaged for five days.

**B.** M-CSF macrophages: Integrated GFP fluorescence intensities across the spheroid area over time, demonstrating enhanced spheroid growth in the presence of anti-inflammatory macrophages. Data are the mean  $\pm$  SE of five replicates analyzed within one representative experiment. AUC quantification, one-way ANOVA Dunnett posttest corrected for multiple comparisons (control vs IFN- $\gamma$   $p = <0.0001$ , control vs IL-4  $p < 0.0001$ , control vs IL-10  $p > 0.999$  (ns), control vs TGF- $\beta$   $p < 0.0001$ , control vs TC  $p < 0.0001$ ).

**C.** GM-CSF macrophages: Analysis as in B (Control vs IFN- $\gamma$   $p < 0.0001$ , control vs IL-4  $p = 0.0002$ , control vs IL-10  $p = 0.0234$ , control vs TGF- $\beta$   $p < 0.0001$ , control vs TC  $p < 0.0001$ ).
